# Supplementary material for: Putrescine Production by Latilactobacillus curvatus KP 3-4 Isolated from Fermented Foods
Source: Microorganisms. 2022 Mar 24;10(4):697. doi: 10.3390/microorganisms10040697 (PMC9026525; doi:10.3390/microorganisms10040697)
Supplement: Supplementary file 1 [file microorganisms-10-00697-s001.zip › Supplementary Figure Caption.pdf]

### **Supplementary Figure S1 Growth curves of lactic acid bacterial strains**

Growth curve of lactic acid bacteria in MRS under anaerobic condition. Data represent means  $\pm$  standard deviation from biological replicates ( $n = 3$ ). The white arrowheads indicate the sampling point used for the growing phase and the black arrowheads indicate the sampling point used for the stationary phase.

### **Supplementary Figure S2 Polyamine concentration in culture supernatant and in the cell of *L. plantarum* JCM 1149<sup>T</sup>**

The concentration of polyamines in the MRS medium and the concentration of polyamines in the culture supernatant and bacterial cells of *L. plantarum* JCM 1149<sup>T</sup> after 10 h and 30 h of incubation in the MRS medium were measured. (A-C) Polyamine concentration in MRS medium and culture supernatant; A: putrescine, B: spermidine, C: spermine. (D-F) Concentration of polyamines in the bacterial cell; D: putrescine, E: spermidine, F: spermine. Data represent means  $\pm$  standard deviation from biological replicates ( $n = 3$ ).

### **Supplementary Figure S3 Changes in the putrescine production of *L. curvatus* KP 3-4 by the supplementation of ornithine.**

*L. curvatus* KP 3-4 was cultured in MRS medium supplemented with ornithine at each concentration (0 mM, 250 mM, 500 mM, 750 mM, 1000 mM, 1200 mM) anaerobically for 48 hours at 37 °C. (A) Growth at each supplement concentration. (B) Putrescine concentration in culture supernatant. Data represent means  $\pm$  standard deviation from biological replicates ( $n = 3$ ).

### **Supplementary Figure S4 Comparative genomics of *L. curvatus* JCM 1096<sup>T</sup> and KP 3-4**

(A) Comparative genomics of the type strain (NZ\_CP026116) and KP 3-4 strain of *L. curvatus*. Regions with high homology are connected by red lines. (B) Schematic diagram of the region that is present in the genome of KP 3-4 and missing in the genome of the type strain, which contains a sequence with high homology to ornithine decarboxylase (SpeC/SpeF) and a sequence with high homology to a putrescine-ornithine antiporter (PotE).
